# Supplementary material for: Benchmarking historical performance and future projections from a global hydrologic model with a basin-scale model
Source: Copernicus journal article supplement (doi:10.5194/egusphere-2024-3170), 2024-11-22
Supplement: Supplementary file 1 [file egusphere-2024-3170-supplement.pdf]

Supplement for

# **Benchmarking historical performance and future projections from a global hydrologic model with a basin-scale model**

Rajesh R. Shrestha<sup>1</sup>, Alex J. Cannon<sup>1</sup>, Sydney Hoffman<sup>2</sup>, Marie Whibley<sup>2</sup>, Aranildo Lima<sup>1</sup>

<sup>1</sup>Climate Research Division, Environment and Climate Change Canada, Victoria, BC, Canada

<sup>2</sup>Watershed Hydrology and Ecology Research Division, Environment and Climate Change Canada, Victoria, BC, Canada

*Correspondence to:* Rajesh R. Shrestha (rajesh.shrestha@ec.gc.ca)

## **Contents of this file**

Tables S1 to S2

Figure S1 to S3

Additional References

**Table S1.** List of GCMs from the CMIP6 experiment used in this study together with time periods SSP2-45 and SSP5-85 simulations of the GCM reach 1.5 to 4.0 °C global warming level (GWL) above the preindustrial period 1850-1900. GWL calculations are performed with respect to 1995-2014 by considering 0.85 °C warming between 1850-1900 to 1995-2014. NA means that the GCM simulation do not reach the specified GWL by the end of the simulation.

| GCM name                                                                                                | Primary reference      | SSP  | GWL 1.5   | GWL 2.0   | GWL 3.0   | GWL 4.0   |
|---------------------------------------------------------------------------------------------------------|------------------------|------|-----------|-----------|-----------|-----------|
| Australian Earth System Model, version 1.5 (ACCESS-ESM1.5)                                              | Ziehn et al. (2020)    | 2-45 | 2019-2038 | 2035-2054 | NA        | NA        |
|                                                                                                         |                        | 5-85 | 2017-2036 | 2029-2048 | 2050-2069 | 2068-2087 |
| The Canadian Earth System Model version 5 (CanESM5)                                                     | Swart et al. (2019)    | 2-45 | 2011-2030 | 2023-2042 | 2051-2070 | NA        |
|                                                                                                         |                        | 5-85 | 2011-2030 | 2021-2040 | 2037-2056 | 2050-2069 |
| Centre National de Recherches Météorologiques and Cerfacs, Earth System Model version 2.1 (CNRM-ESM2.1) | Séférian et al. (2019) | 2-45 | 2021-2040 | 2038-2057 | 2074-2093 | NA        |
|                                                                                                         |                        | 5-85 | 2018-2037 | 2031-2050 | 2049-2068 | 2063-2082 |
| European Community Earth System Model version 3 (EC-Earth3)                                             | Döscher et al. (2022)  | 2-45 | 2014-2033 | 2036-2055 | 2078-2097 | NA        |
|                                                                                                         |                        | 5-85 | 2015-2034 | 2026-2045 | 2048-2067 | 2064-2083 |
| Geophysical Fluid Dynamics Laboratory Earth System Model, version 4.1 (GFDL-ESM 4.1)                    | Dunne et al. (2020)    | 2-45 | 2024-2043 | 2050-2069 | NA        | NA        |
|                                                                                                         |                        | 5-85 | 2023-2042 | 2037-2056 | 2061-2080 | NA        |
| Model for Interdisciplinary Research on Climate version 6 (MIROC6)                                      | Tatebe et al. (2019)   | 2-45 | 2024-2043 | 2050-2069 | NA        | NA        |
|                                                                                                         |                        | 5-85 | 2022-2041 | 2037-2056 | 2062-2081 | 2080-2099 |
| Max Planck Institute Earth System Model High Resolution version 1.2 (MPI-ESM1.2-HR)                     | Müller et al. (2018)   | 2-45 | 2027-2046 | 2053-2072 | NA        | NA        |
|                                                                                                         |                        | 5-85 | 2023-2042 | 2039-2058 | 2064-2083 | NA        |
| Meteorological Research Institute Earth System Model version 2.0 (MRI-ESM2.0)                           | Yukimoto et al. (2019) | 2-45 | 2017-2036 | 2035-2054 | NA        | NA        |
|                                                                                                         |                        | 5-85 | 2013-2032 | 2025-2044 | 2052-2071 | 2071-2090 |

**Table S2.** Comparison of the goodness-of-fit (GOF) metrics for VIC and CWatM SWE results. Summarized metrics include Nash-Sutcliffe coefficient of efficiency (NSE), Kling-Gupta coefficient (KGE) and % volume bias (VB) for the available data, the stations correspond to Fig. S1.

| Station    | VIC  |      |      | CWatM |      |      |
|------------|------|------|------|-------|------|------|
|            | NSE  | KGE  | VB   | NSE   | KGE  | VB   |
| BCE-4D14P  | 0.80 | 0.84 | -6.2 | 0.61  | 0.74 | 10.4 |
| SCD-YT056  | 0.73 | 0.78 | -8.2 | 0.68  | 0.80 | 12.1 |
| YK-10AD-M1 | 0.62 | 0.77 | 13.5 | 0.68  | 0.77 | 10.4 |

BCE-4D14P Wade Lake (58.183, -128.9, 1370)

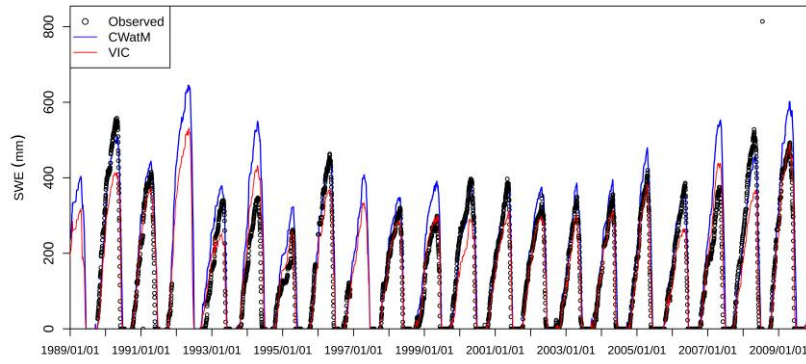

SCD-YT056 Watson Lake (60.116, -128.833, 685)

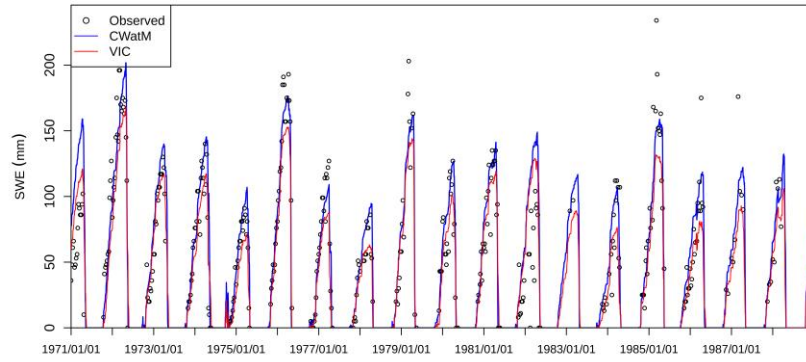

YK-10AD-M1 Hyland River (61.527, -128.272, 867.3)

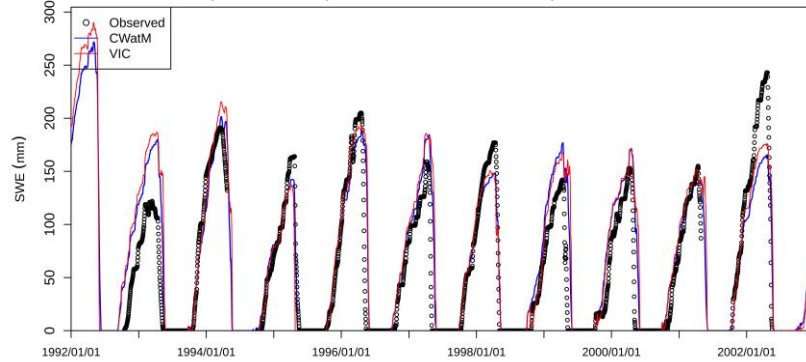

**Figure S1.** Observed vs. simulated SWE from CWatM and VIC models for three stations with highest numbers of observations.

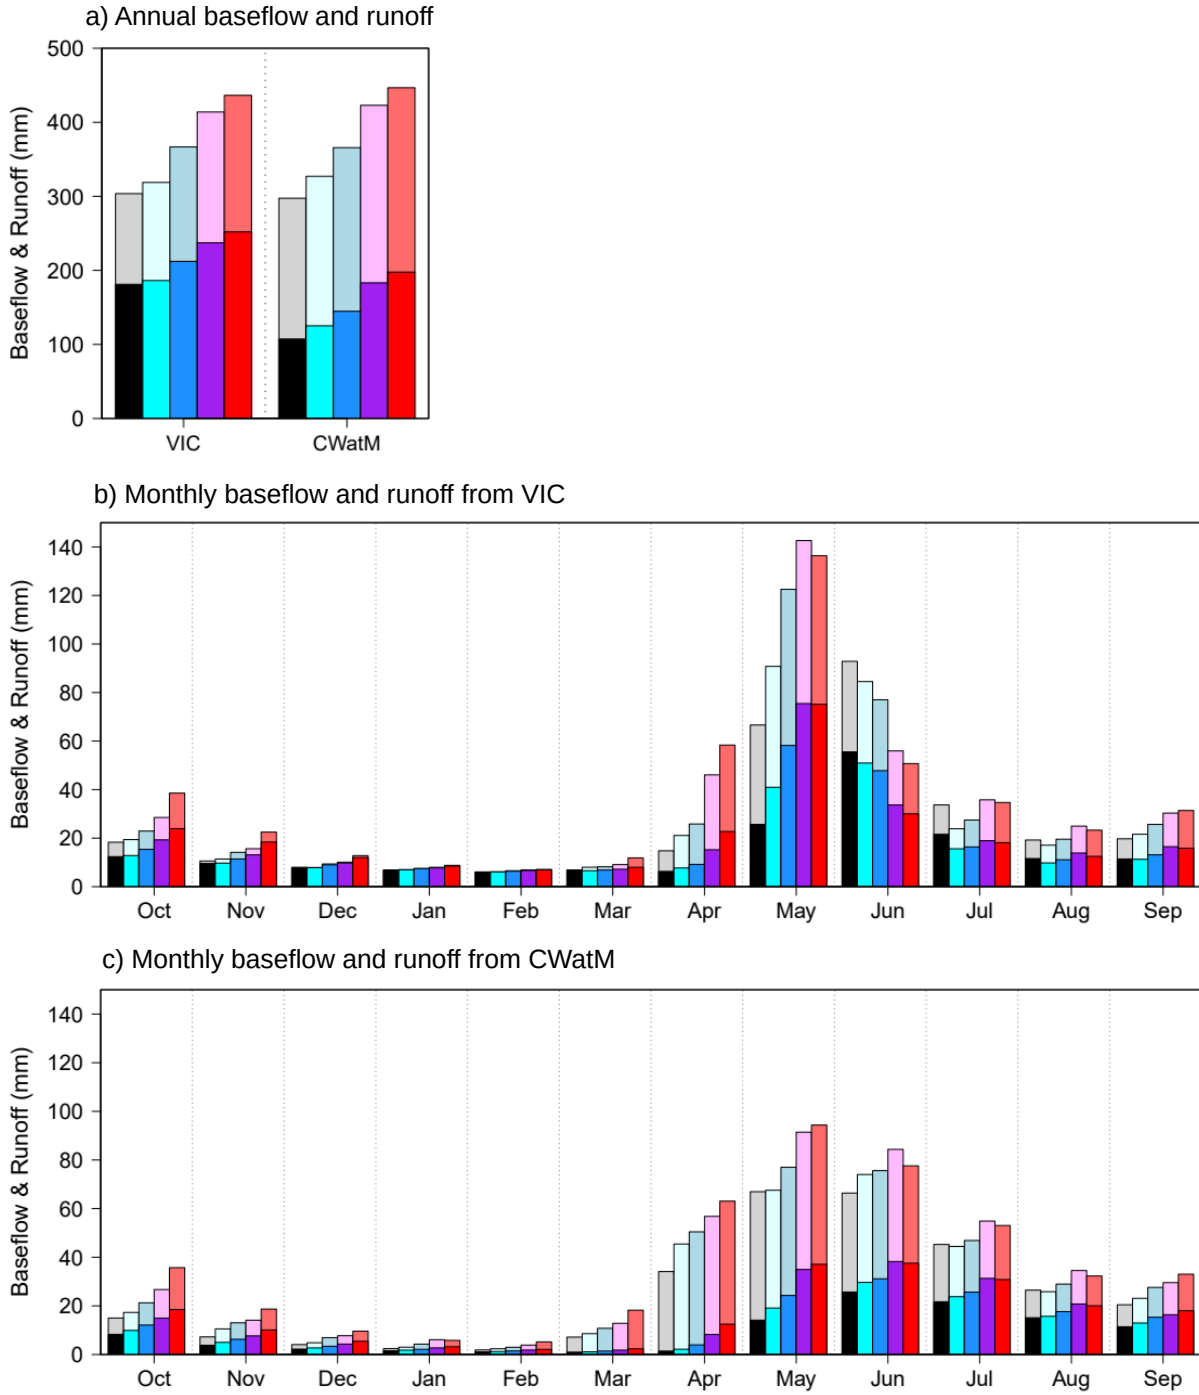

Figure S2. Sample annual and monthly runoff distribution obtained from CanESM5 GCM driven VIC and CWatM runs for historical (1971-2000) and 1.5 to 4.0 °C GWLs. The upper and lower portions of the bar plots show surface runoff and baseflow, respectively.

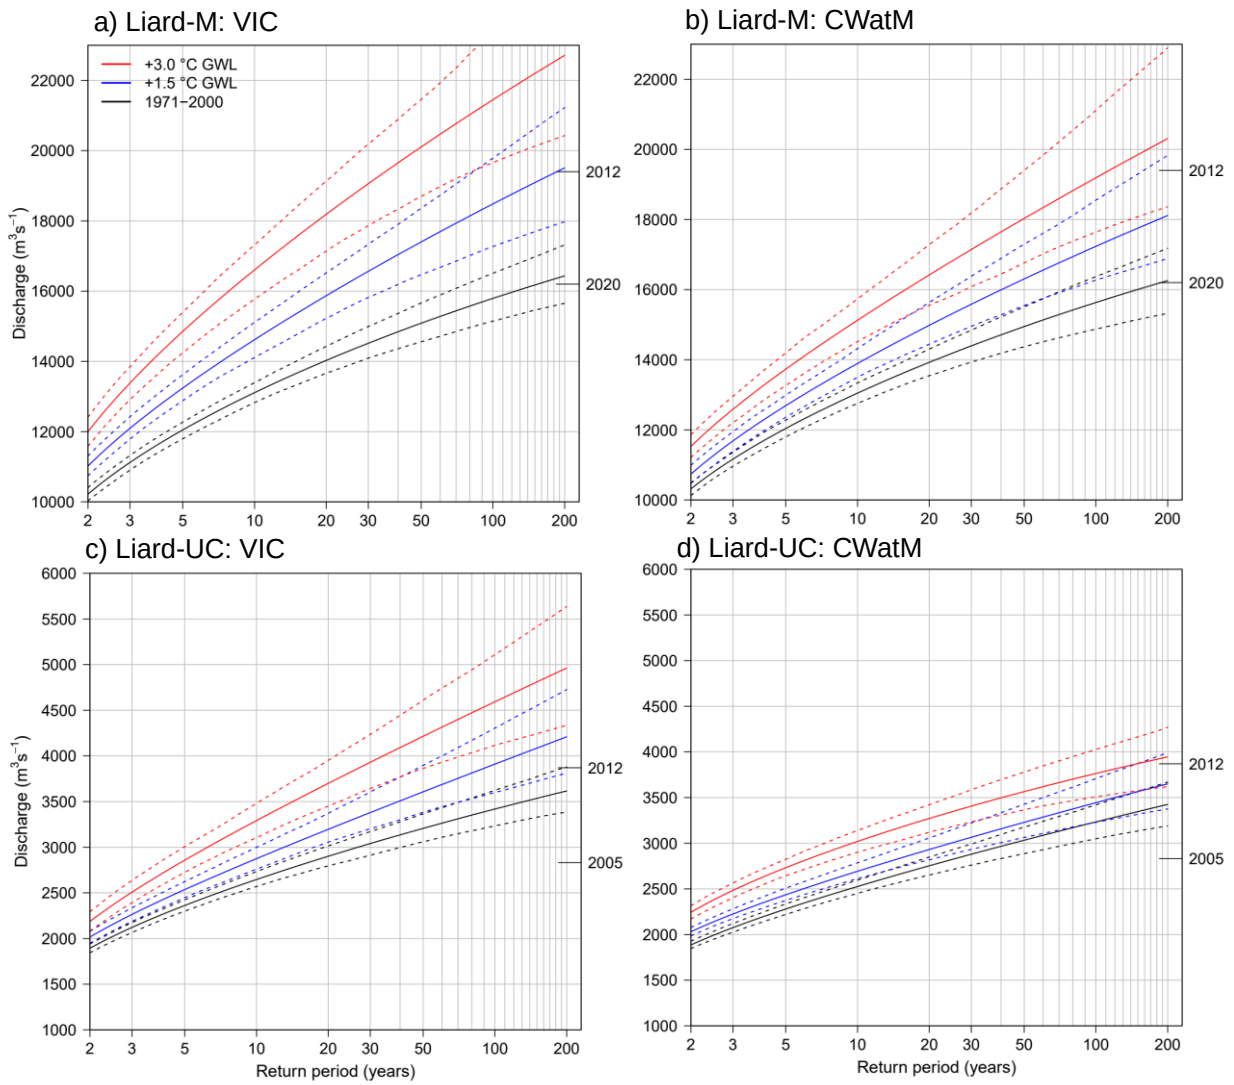

Figure S3: Flood frequency plots of annual maximum flows obtained from the model simulations driven by the GCM ensembles: a) VIC for Liard-M station, b) CWatM for Liard-M station, c) VIC for Liard-UC station, and d) CWatM for Liard-UC station. The results are shown for the historical period (1971-2000) and 1.5 and 3.0 °C GWLs. Dashed lines show the 95% confidence intervals. The years on the right axes of each plot indicate the two highest recorded historical flood events.

## Additional References

- Döscher, R., Acosta, M., Alessandri, A., Anthoni, P., Arsouze, T., Bergman, T., Bernardello, R., Boussetta, S., Caron, L.-P., Carver, G., Castrillo, M., Catalano, F., Cvijanovic, I., Davini, P., Dekker, E., Doblas-Reyes, F.J., Docquier, D., Echevarria, P., Fladrich, U., Fuentes-Franco, R., Gröger, M., v. Hardenberg, J., Hieronymus, J., Karami, M.P., Keskinen, J.-P., Koenigk, T., Makkonen, R., Massonnet, F., Ménégoz, M., Miller, P.A., Moreno-Chamarro, E., Nieradzick, L., van Noije, T., Nolan, P., O'Donnell, D., Ollinaho, P., van den Oord, G., Ortega, P., Prims, O.T., Ramos, A., Reerink, T., Rousset, C., Ruprich-Robert, Y., Le Sager, P., Schmith, T., Schrödner, R., Serva, F., Sicardi, V., Sloth Madsen, M., Smith, B., Tian, T., Tourigny, E., Uotila, P., Vancoppenolle, M., Wang, S., Wårlind, D., Willén, U., Wyser, K., Yang, S., Yepes-Arbós, X., Zhang, Q., 2022. The EC-Earth3 Earth system model for the Coupled Model Intercomparison Project 6. *Geoscientific Model Development* 15, 2973–3020. <https://doi.org/10.5194/gmd-15-2973-2022>
- Dunne, J.P., Horowitz, L.W., Adcroft, A.J., Ginoux, P., Held, I.M., John, J.G., Krasting, J.P., Malyshev, S., Naik, V., Paulot, F., Shevliakova, E., Stock, C.A., Zadeh, N., Balaji, V., Blanton, C., Dunne, K.A., Dupuis, C., Durachta, J., Dussin, R., Gauthier, P.P.G., Griffies, S.M., Guo, H., Hallberg, R.W., Harrison, M., He, J., Hurlin, W., McHugh, C., Menzel, R., Milly, P.C.D., Nikonov, S., Paynter, D.J., Ploshay, J., Radhakrishnan, A., Rand, K., Reichl, B.G., Robinson, T., Schwarzkopf, D.M., Sentman, L.T., Underwood, S., Vahlenkamp, H., Winton, M., Wittenberg, A.T., Wyman, B., Zeng, Y., Zhao, M., 2020. The GFDL Earth System Model Version 4.1 (GFDL-ESM 4.1): Overall Coupled Model Description and Simulation Characteristics. *Journal of Advances in Modeling Earth Systems* 12, e2019MS002015. <https://doi.org/10.1029/2019MS002015>
- Müller, W.A., Jungclaus, J.H., Mauritsen, T., Baehr, J., Bittner, M., Budich, R., Bunzel, F., Esch, M., Ghosh, R., Haak, H., Ilyina, T., Kleine, T., Kornblüeh, L., Li, H., Modali, K., Notz, D., Pohlmann, H., Roeckner, E., Stemmler, I., Tian, F., Marotzke, J., 2018. A Higher-resolution Version of the Max Planck Institute Earth System Model (MPI-ESM1.2-HR). *Journal of Advances in Modeling Earth Systems* 10, 1383–1413. <https://doi.org/10.1029/2017MS001217>
- Séférian, R., Nabat, P., Michou, M., Saint-Martin, D., Voldoire, A., Colin, J., Decharme, B., Delire, C., Berthet, S., Chevallier, M., Sénési, S., Franchisteguy, L., Vial, J., Mallet, M., Joetzjer, E., Geoffroy, O., Guérémy, J.-F., Moine, M.-P., Msadek, R., Ribes, A., Rocher, M., Roehrig, R., Salas-y-Méllia, D., Sanchez, E., Terray, L., Valcke, S., Waldman, R., Aumont, O., Bopp, L., Deshayes, J., Éthé, C., Madec, G., 2019. Evaluation of CNRM Earth System Model, CNRM-ESM2-1: Role of Earth System Processes in Present-Day and Future Climate. *Journal of Advances in Modeling Earth Systems* 11, 4182–4227. <https://doi.org/10.1029/2019MS001791>
- Swart, N.C., Cole, J.N.S., Kharin, V.V., Lazare, M., Scinocca, J.F., Gillett, N.P., Anstey, J., Arora, V., Christian, J.R., Hanna, S., Jiao, Y., Lee, W.G., Majaess, F., Saenko, O.A., Seiler, C., Seinen, C., Shao, A., Sigmond, M., Solheim, L., von Salzen, K., Yang, D., Winter, B., 2019. The Canadian Earth System Model version 5 (CanESM5.0.3). *Geoscientific Model Development* 12, 4823–4873. <https://doi.org/10.5194/gmd-12-4823-2019>
- Tatebe, H., Ogura, T., Nitta, T., Komuro, Y., Ogochi, K., Takemura, T., Sudo, K., Sekiguchi, M., Abe, M., Saito, F., Chikira, M., Watanabe, S., Mori, M., Hirota, N., Kawatani, Y., Mochizuki, T., Yoshimura, K., Takata, K., O'ishi, R., Yamazaki, D., Suzuki, T., Kurogi, M., Kataoka, T., Watanabe, M., Kimoto, M., 2019. Description and basic evaluation of simulated mean state, internal variability, and climate sensitivity in MIROC6. *Geoscientific Model Development* 12, 2727–2765. <https://doi.org/10.5194/gmd-12-2727-2019>
- Yukimoto, S., Kawai, H., Koshiro, T., Oshima, N., Yoshida, K., Urakawa, S., Tsujino, H., Deushi, M., Tanaka, T., Hosaka, M., Yabu, S., Yoshimura, H., Shindo, E., Mizuta, R., Obata, A., Adachi, Y., Ishii, M., 2019. The Meteorological Research Institute Earth System Model Version 2.0, MRI-ESM2.0: Description and Basic Evaluation of the Physical Component. *Journal of the Meteorological Society of Japan. Ser. II advpub*. <https://doi.org/10.2151/jmsj.2019-051>
- Ziehn, T., Chamberlain, M.A., Law, R.M., Lenton, A., Bodman, R.W., Dix, M., Stevens, L., Wang, Y.-P., Srbinovsky, J., 2020. The Australian Earth System Model: ACCESS-ESM1.5. *JSHES* 70, 193–214. <https://doi.org/10.1071/ES19035>
